# Supplementary material
Source: PubMed Central journal article supplement (PMC2837761)
Supplement: NIHMS182613-supplement-1_si_001.pdf [file NIHMS182613-supplement-1_si_001.pdf]

## Supporting Information

### <sup>13</sup>C-Formylation for <sup>1</sup>H-<sup>13</sup>C 2D NMR Profiling of Amino Metabolites in Biofluids

*Tao Ye,<sup>1</sup> Shucha Zhang,<sup>1</sup> Huaping Mo,<sup>2,3</sup> Fariba Tayyari,<sup>1</sup>*

*G. A. Nagana Gowda,<sup>1</sup> and Daniel Raftery\*<sup>1</sup>*

<sup>1</sup>Department of Chemistry

<sup>2</sup>Purdue Inter-Departmental NMR Facility

<sup>3</sup>Department of Medicinal Chemistry and Molecular Pharmacology

Purdue University, West Lafayette, IN 47907

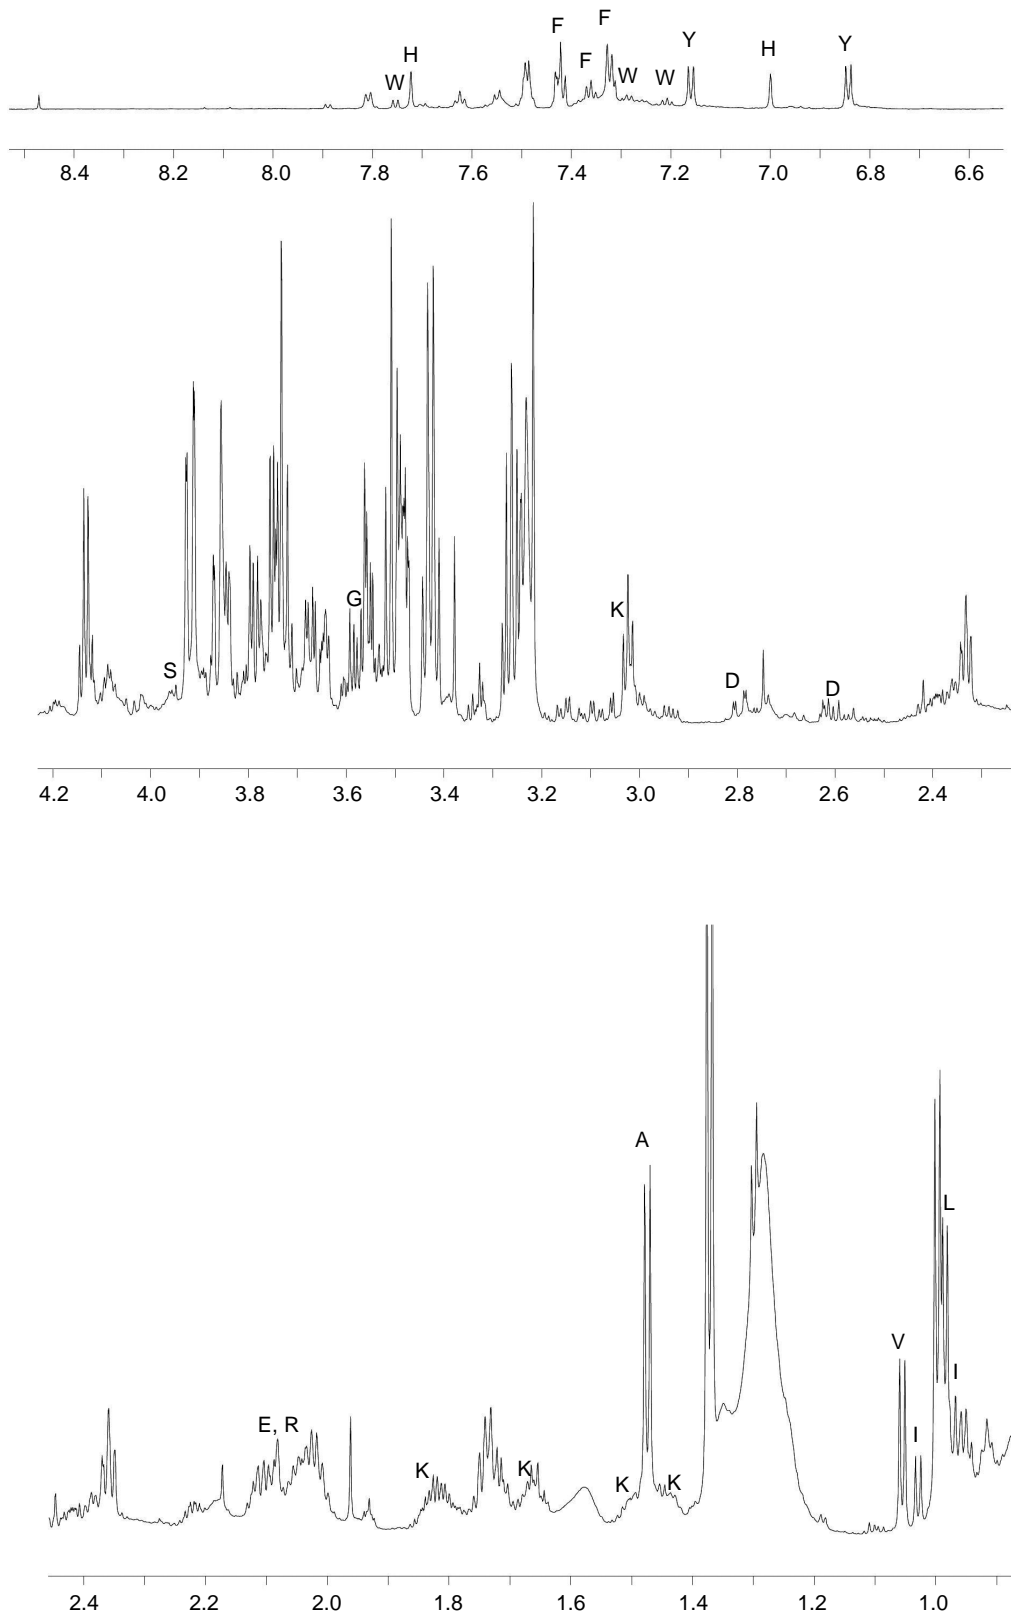

Figure S1. 1D <sup>1</sup>H NMR spectrum of the serum sample before <sup>13</sup>C-formylation with peak assignment.

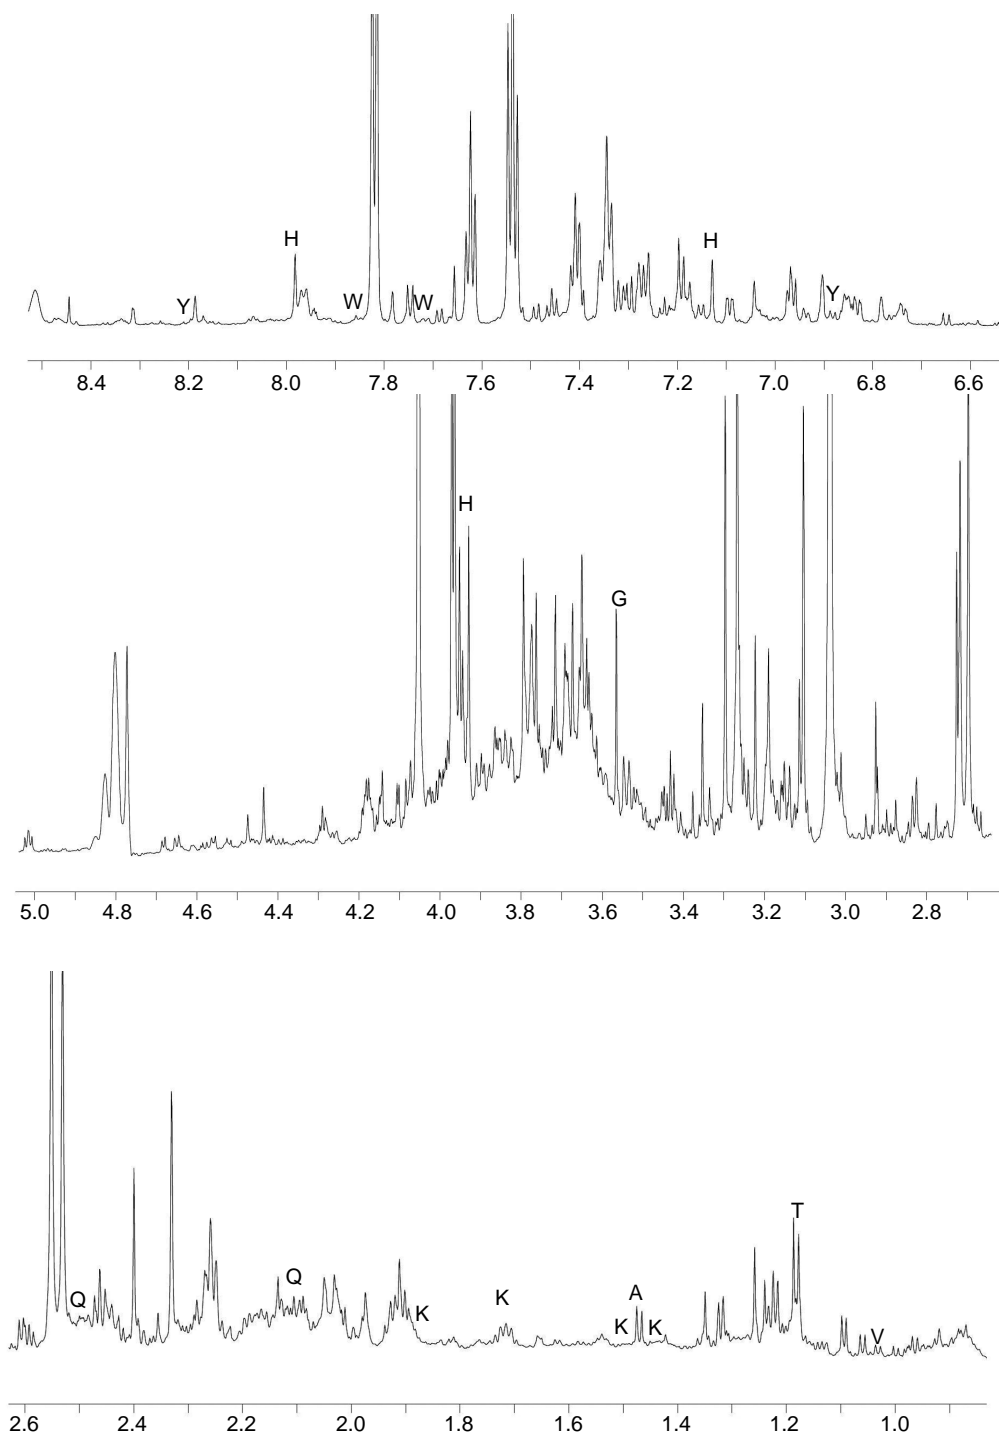

Figure S2. 1D  $^1\text{H}$  NMR spectrum of the urine sample before  $^{13}\text{C}$ -formylation with peak assignment.

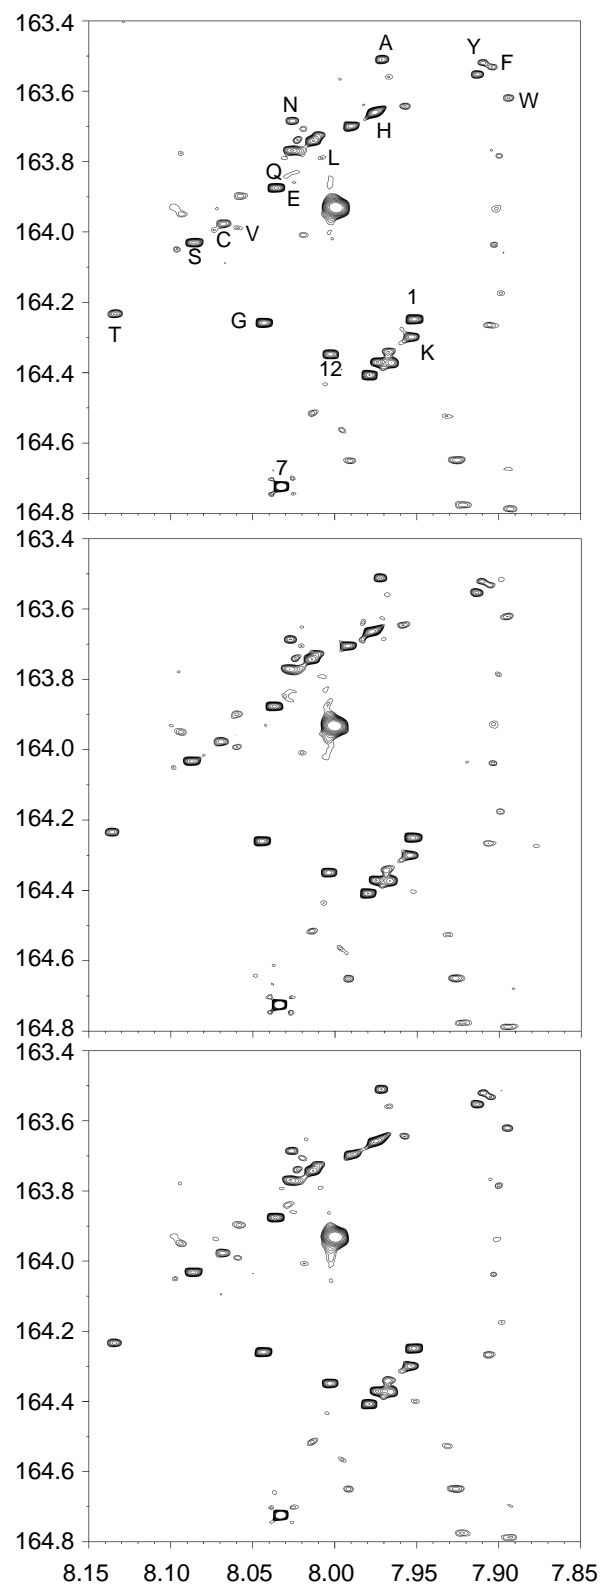

Figure S3.  $^1\text{H}$ - $^{13}\text{C}$  2D NMR spectra of a split of healthy human urine sample obtained by individual  $^{13}\text{C}$ -formylation and HSQC analysis.

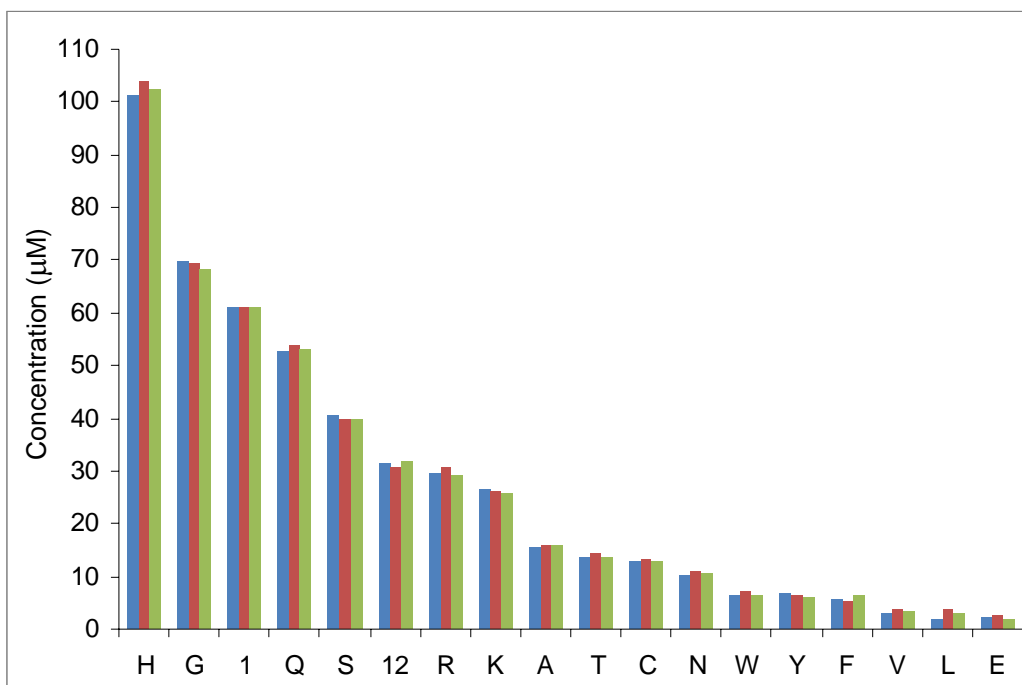

Figure S4. Concentrations of amino metabolites obtained from the triplicate reaction and analysis of a split of human urine sample. Metabolites in the same split sample are represented by the same color. Concentrations were measured by integrating 2D signals referencing to  $^{13}\text{C}$ -tagged 0.2 mM ethanolamine (internal standard). The average coefficient of variation (CV) is 2% for 12 metabolites above 10  $\mu\text{M}$  and 11% for 6 metabolites below 10  $\mu\text{M}$  (SNR are less than 8 for 3 metabolites below 4  $\mu\text{M}$ , which contributes to the observed error).

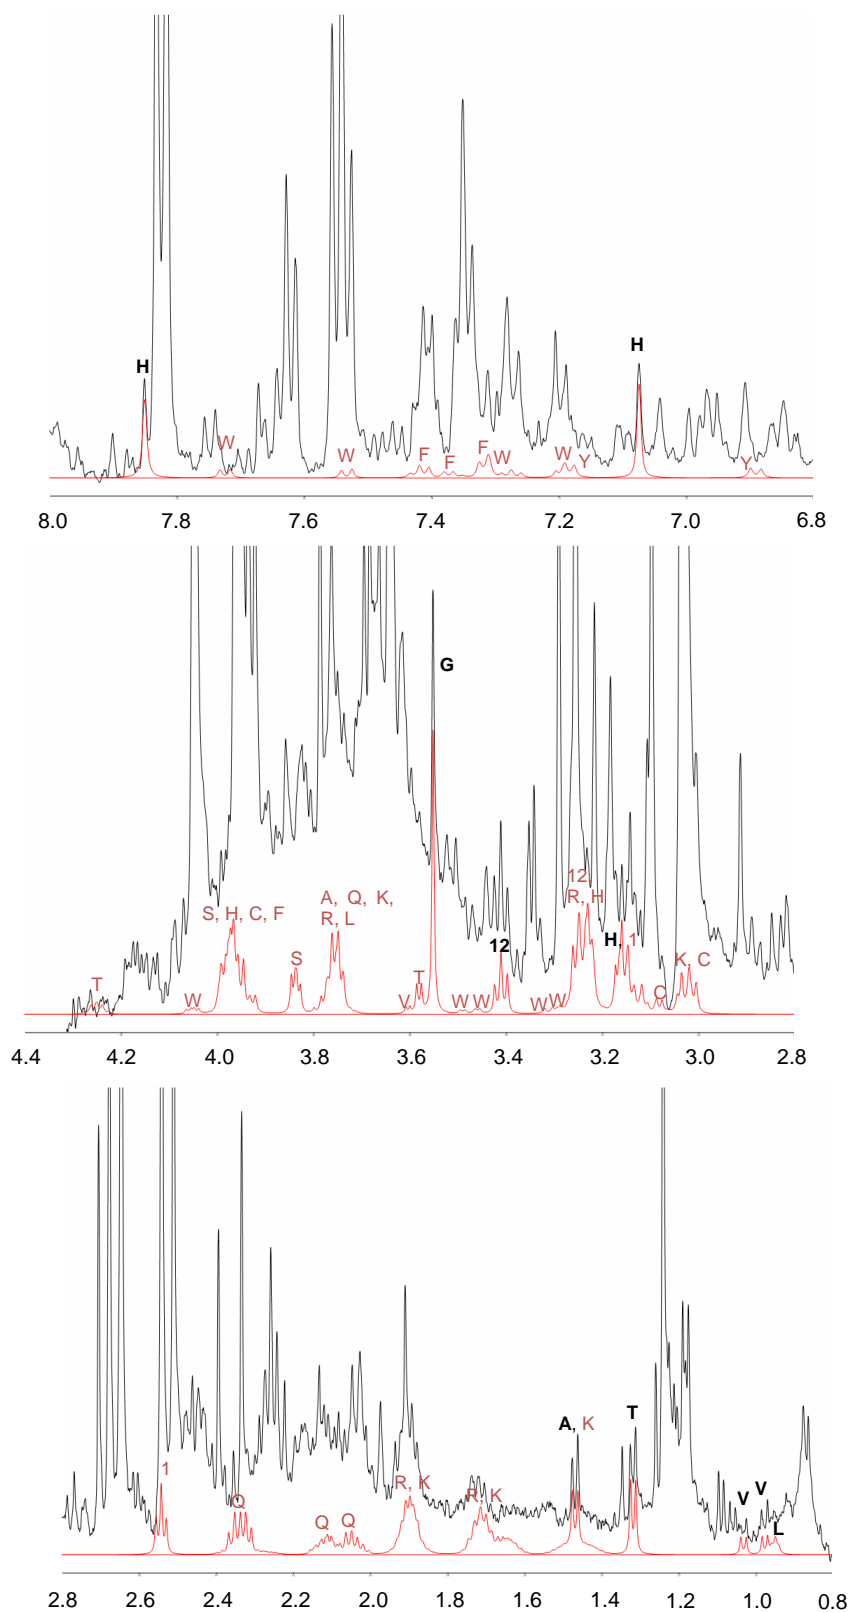

Figure S5. 1D <sup>1</sup>H NMR spectrum of the same human urine sample used for triplicate analysis as in Figure S3. Recognizable signals of amino metabolites are assigned in black; the simulated spectrum generated by Chenomx NMR Suite professional 5.1 (Chenomx, Inc.) with assignments of metabolites observed through <sup>13</sup>C-formylation is shown in red.
